# Supplementary material for: Transgene expression of Stanniocalcin-1 provides sustained intraocular pressure reduction by increasing outflow facility
Source: PubMed Central journal article supplement (PMC9154118; doi:10.1371/journal.pone.0269261), 2022-05-31
Supplement: pone.0269261.s004.pdf [file pone.0269261.s004.pdf]

GW Roddy et al. *Transgene expression of Stanniocalcin-1 provides sustained intraocular pressure reduction by increasing outflow facility*

Exp 1 (Fig 1)

| Days           | Baseline | Days post-injection |        |        |        |
|----------------|----------|---------------------|--------|--------|--------|
|                | n=26     | n=16                | n=8    |        |        |
|                | Baseline | 1                   | 2      | 3      | 4      |
| ssAAV2-GFP inj | 16.60    | 13.97               | 16.60  | 16.75  | 17.35  |
| ssAAV2-STC-1-f | 16.55    | 13.47               | 13.36  | 14.67  | 14.58  |
| % Change       | -0.31    | -3.62               | -19.51 | -12.44 | -15.97 |
| P-Value        | 0.43     | 0.54                | 0.00   | 0.00   | 0.00   |

Exp 2 (Fig 3)

| Average IOP in | Baseline | Month 1 |        |        |        |       |       |       |        |        |        |
|----------------|----------|---------|--------|--------|--------|-------|-------|-------|--------|--------|--------|
|                |          | 1.0     | 2.0    | 3.0    | 4.0    | 5.0   | 6.0   | 7.0   | 7.5-8* | 8*     | 9*     |
| PBS Injected   | 16.41    | 16.82   | 16.23  | 16.95  | 16.34  | 16.71 | 16.40 | 16.09 | 16.18  | 16.52  | 16.90  |
| ssAAV2-STC-1-f | 16.56    | 14.10   | 13.56  | 14.45  | 14.25  | 15.07 | 15.01 | 15.06 | 12.79  | 13.06  | 13.33  |
| % change       | 1.01     | -16.19  | -16.30 | -14.70 | -13.10 | -9.66 | -8.37 | -6.22 | -20.85 | -20.85 | -21.21 |
| P-Value        | 0.21     | 0.00    | 0.00   | 0.00   | 0.00   | 0.00  | 0.00  | 0.01  | 0.00   | 0.00   | 0.00   |

Exp 3 (Fig 4)

|                                     | Baseline | n=12  |       |       |       |       | n=8   |       |       | Re-Injected (n=4) |       |       |       |       |       |
|-------------------------------------|----------|-------|-------|-------|-------|-------|-------|-------|-------|-------------------|-------|-------|-------|-------|-------|
|                                     |          | 1     | 2     | 3     | 4     | 5     | 6     | 7     | 8     | 9                 | 10    | 12    | 14    | 16    | 18    |
| ssAAV2-GFP inj                      | 16.78    | 16.44 | 16.90 | 17.06 | 16.74 | 16.35 | 15.93 | 16.24 | 15.96 | 16.52             | 16.92 | 16.00 | 16.92 | 16.96 | 16.38 |
| ssAAV2-STC-1-f                      | 16.74    | 14.50 | 13.97 | 14.03 | 14.57 | 13.82 | 14.24 | 13.72 | 13.71 | 14.15             | 14.33 | 13.58 | 14.00 | 13.13 | 13.44 |
| Re-Injected ssAAV2-GFP (n=4)        |          |       |       |       |       |       |       |       |       | 16.52             | 16.29 | 16.79 | 16.46 | 16.56 | 16.73 |
| Re-Injected ssAAV2-STC-1-FLAG (n=4) |          |       |       |       |       |       |       |       |       | 14.15             | 11.25 | 12.04 | 13.17 | 14.04 | 13.52 |

Exp 4 (Fig 6)

| Average IOP in | Baseline | 1      | 4      | 8      | 14     |
|----------------|----------|--------|--------|--------|--------|
| ssAAV2-GFP     | 16.28    | 16.32  | 17.15  | 16.22  | 16.63  |
| ssAAV2-STC-1-f | 16.34    | 13.98  | 14.22  | 13.35  | 14.95  |
| % change       | 0.57     | -14.10 | -16.98 | -17.67 | -10.05 |
| P-Value        | 0.82     | 0.01   | 0.00   | 0.00   | 0.00   |

Experiment 5 (Fig 7, S3)

Outflow facility

|                      | AV    | Std Dev |
|----------------------|-------|---------|
| Untreated (n=4)      | 0.025 | 0.006   |
| ssAAV2-GFP (n=4)     | 0.016 | 0.005   |
| ssAAV2-STC-1-f (n=4) | 0.038 | 0.008   |
| Topical LFA (n=4)    | 0.046 | 0.018   |
| Topical STC-1 (n=4)  | 0.048 | 0.015   |
| Uveoscleral          |       |         |
|                      | AV    | Std Dev |
| Untreated (n=4)      | 0.040 | 0.027   |
| ssAAV2-GFP (n=4)     | 0.078 | 0.028   |
| ssAAV2-STC-1-f (n=4) | 0.044 | 0.034   |

|                  |       |       |
|------------------|-------|-------|
| Topical LFA (n=  | 0.046 | 0.019 |
| Topical STC-1 (r | 0.043 | 0.026 |
| EVP              |       |       |

|                  | AV     | Std Dev |
|------------------|--------|---------|
| Untreated (n=4   | 12.505 | 2.689   |
| ssAAV2-GFP (n=   | 12.212 | 1.611   |
| ssAAV2-STC-1-f   | 10.960 | 0.657   |
| Topical LFA (n=  | 10.002 | 2.362   |
| Topical STC-1 (r | 10.483 | 1.632   |

Aqueous formation

|                  | AV    | Std Dev |
|------------------|-------|---------|
| Untreated (n=4   | 0.118 | 0.063   |
| ssAAV2-GFP (n=   | 0.132 | 0.058   |
| ssAAV2-STC-1-f   | 0.134 | 0.050   |
| Topical LFA (n=  | 0.200 | 0.131   |
| Topical STC-1 (r | 0.168 | 0.036   |

Measured IOP

|                  | AV     | Std Dev |
|------------------|--------|---------|
| Untreated (n=4   | 15.915 | 0.499   |
| ssAAV2-GFP (n=   | 16.000 | 1.225   |
| ssAAV2-STC-1-f   | 13.400 | 0.548   |
| Topical LFA (n=  | 13.200 | 0.899   |
| Topical STC-1 (r | 13.230 | 0.632   |
