# Supplementary material for: Transgene expression of Stanniocalcin-1 provides sustained intraocular pressure reduction by increasing outflow facility
Source: PubMed Central journal article supplement (PMC9154118; doi:10.1371/journal.pone.0269261), 2022-05-31
Supplement: pone.0269261.s005.pdf [file pone.0269261.s005.pdf]

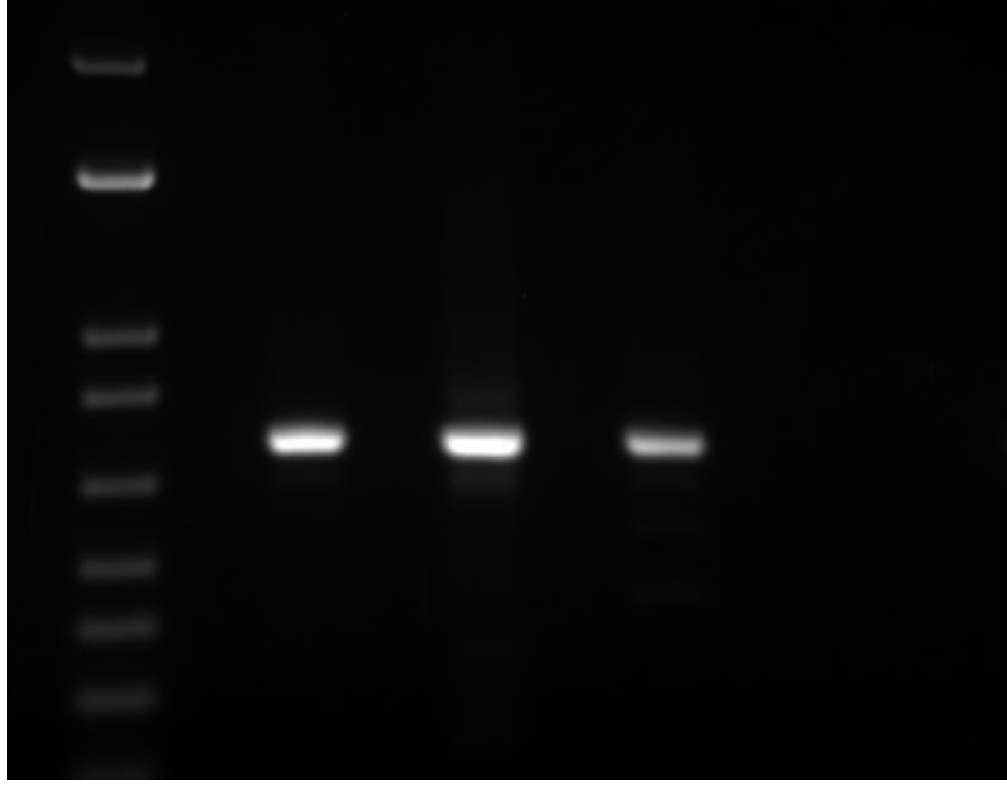

Mouse 1  
ssAAV2-STC-1-FLAG  
ssAAV2-GFP

Mouse 2  
ssAAV2-STC-1-FLAG  
ssAAV2-GFP

Mouse 3  
ssAAV2-STC-1-FLAG  
ssAAV2-GFP

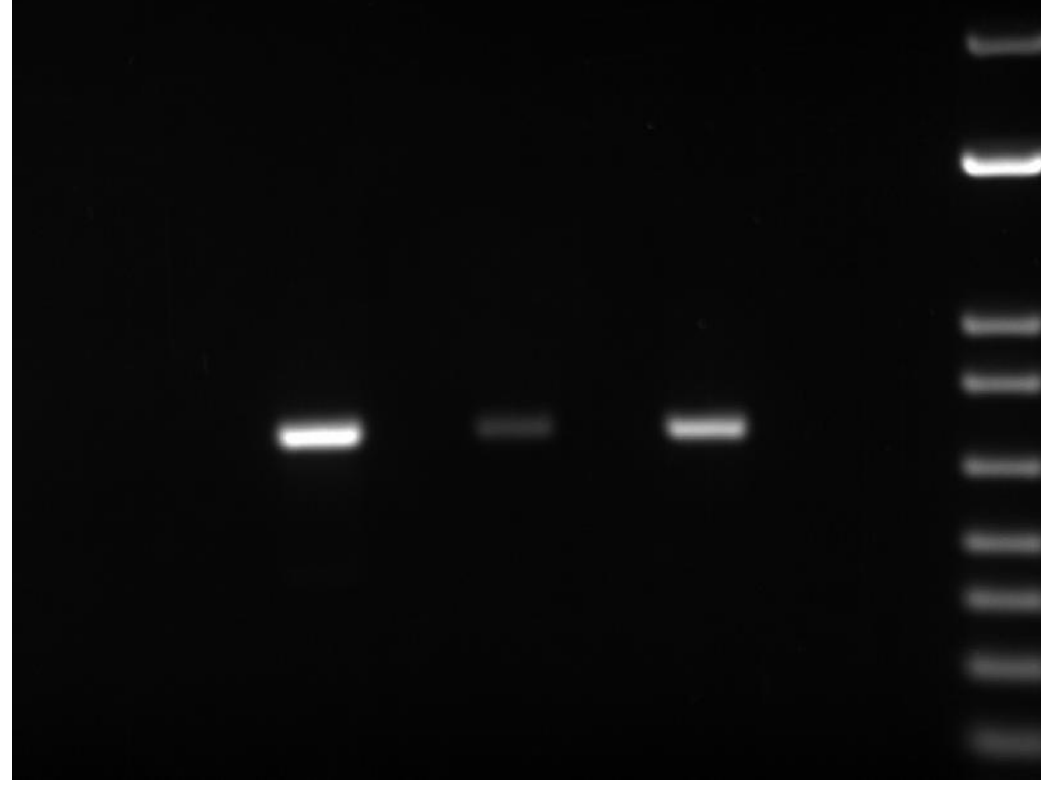

Mouse 4  
ssAAV2-STC-1-FLAG  
ssAAV2-GFP

Mouse 5  
ssAAV2-STC-1-FLAG  
ssAAV2-GFP

Mouse 6  
ssAAV2-STC-1-FLAG  
ssAAV2-GFP
